# Supplementary material for: Determination of Phloridzin and Other Phenolic Compounds in Apple Tree Leaves, Bark, and Buds Using Liquid Chromatography with Multilayered Column Technology and Evaluation of the Total Antioxidant Activity
Source: MDPI journal article supplement (doi:10.3390/ph15020244), 2022-02-18
Supplement: s1 [file s1]

**Determination of phloridzin and other phenolic compounds in apple tree leaves, bark, and buds using liquid chromatography with multilayered column technology and evaluation of the total antioxidant activity.**

Anežka Adamcová<sup>1</sup>, Aleš Horna<sup>2, 1</sup>, Dalibor Šatínský<sup>1\*</sup>

<sup>1</sup> Department of Analytical Chemistry, Faculty of Pharmacy in Hradec Králové, Charles University, Czech Republic

<sup>2</sup> Institute of Nutrition and Diagnostics Pardubice, Sakařova 1400, 530 03 Pardubice, Czech Republic

\* Corresponding author: satinsky@faf.cuni.cz, tel. +420495067228

**Supplementary material**

|        |                                                                                                               |   |
|--------|---------------------------------------------------------------------------------------------------------------|---|
| 1.     | The list of published HPLC conditions for determination of different phenolic substances in apple leaves....  | 2 |
| 2.     | HPLC method.....                                                                                              | 2 |
| 2.1.   | Chromatograms of mixed standard solution in tested stationary phases determined at wavelength of 254 nm ..... | 2 |
| 2.1.1. | YMC Triart C18 (100 × 4.6 mm, 5 µm particle size) .....                                                       | 2 |
| 2.1.2. | YMC Triart PFP plus (150 × 4.6 mm, 5 µm particle size).....                                                   | 3 |
| 2.1.3. | Discovery® HS C18 (150 × 4.6 mm, 5 µm particle size) .....                                                    | 3 |
| 2.1.4. | Kinetex® F5 100A (150 × 4.6 mm, 2.6 µm particle size) .....                                                   | 4 |
| 2.1.5. | Kinetex® C18 100A (150 × 4.6 mm, 2.6 µm particle size).....                                                   | 4 |
| 2.1.6. | Luna Omega Polar C18 (150 × 4.6 mm, 5 µm particle size) .....                                                 | 5 |
| 2.1.7. | Kinetex 100A Biphenyl (150 × 4.6 mm, 5 µm particle size).....                                                 | 5 |
| 2.1.8. | Ascentis Express RP amide (150 × 4.6 mm, 2.7 µm particle size).....                                           | 6 |
| 2.2.   | The parameters of chromatography separation of tested columns .....                                           | 7 |
| 2.3.   | Optimization of extraction procedure – the effect of pH .....                                                 | 8 |
| 3.     | Flow analysis with CoulArray Detector .....                                                                   | 8 |
| 3.1.   | FIAGram .....                                                                                                 | 8 |
| 3.2.   | The total antioxidant activity of tested cultivars .....                                                      | 9 |
| 4.     | Graphical evaluation of concentration of individual phenolic compounds .....                                  | 9 |

1. The list of published HPLC conditions for determination of different phenolic substances in apple leaves

**Table S1.** List of published HPLC conditions for determination of different phenolic substances in apple leaves.

| Sample       | Analytes                                                                                                       | Column                                              | Mobile phase                                            | Det. | Ref. |
|--------------|----------------------------------------------------------------------------------------------------------------|-----------------------------------------------------|---------------------------------------------------------|------|------|
| Apple leaves | avicularin, quercetin-3-galactoside, caffeic acid, catechin, epicatechin, chlorogenic acid,                    | YMC-Pack ODS-A C18 (250 × 4.6mm, 5µm)               | A: ACN<br>B: 2% CH <sub>3</sub> COOH + H <sub>2</sub> O | PDA  | [1]  |
|              | isoquercitrin, phloretin, phloridzin, quercitrin, rutin                                                        | Precolumn: YMC-Triart C18 (10 × 3 mm, 5 µm)         |                                                         |      |      |
| Apple leaves | chlorogenic acid, isoquercitrin, quercitrin, p-hydroxybenzoic acid, quercetin-3-galactoside, phloridzin, rutin | Thermo Scientific Aquasil C18 (250 × 4.6 mm, 5 µm)  | A: ACN<br>B: 1 mM phosphoric acid                       | PDA  | [2]  |
|              |                                                                                                                |                                                     |                                                         |      |      |
| Apple leaves | epikatechin, isoquercitrin, quercitrin, phloretin phloridzin,                                                  | Synergi MAX RP80, C <sub>12</sub> (250 × 4.6, 4 µm) | A: ACN<br>B: 0.01% trifluoroacetic acid                 | PDA  | [3]  |
|              |                                                                                                                |                                                     |                                                         |      |      |

2. HPLC method

2.1. Chromatograms of mixed standard solution in tested stationary phases determined at wavelength of 254 nm

2.1.1. YMC Triart C18 (100 × 4.6 mm, 5 µm particle size)

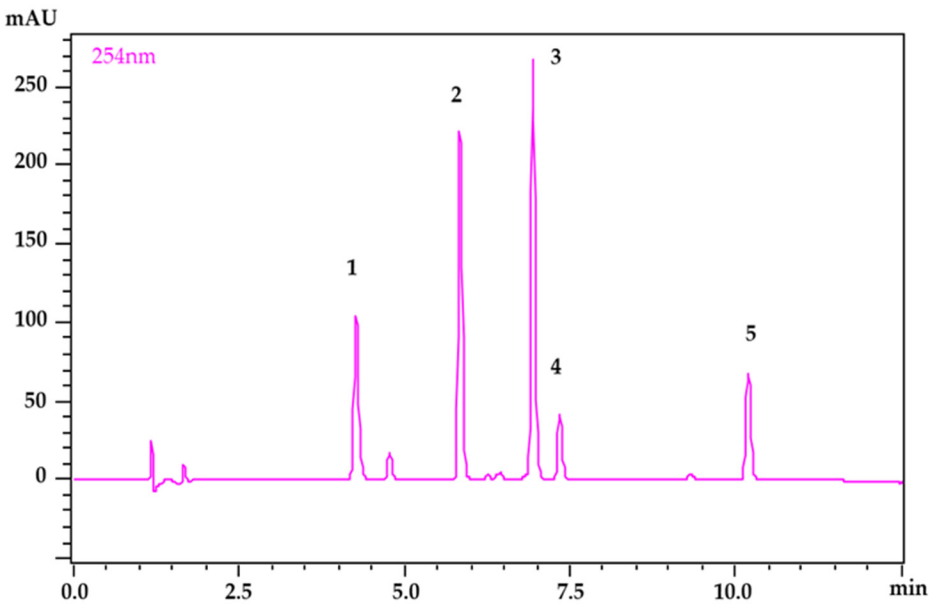

**Figure S1.** Chromatogram of mixed standard solution. (1) chlorogenic acid, (2) rutin, (3) quercitrin, (4) phloridzin, (5) phloretin.

2.1.2. YMC Triart PFP plus (150 × 4.6 mm, 5 μm particle size)

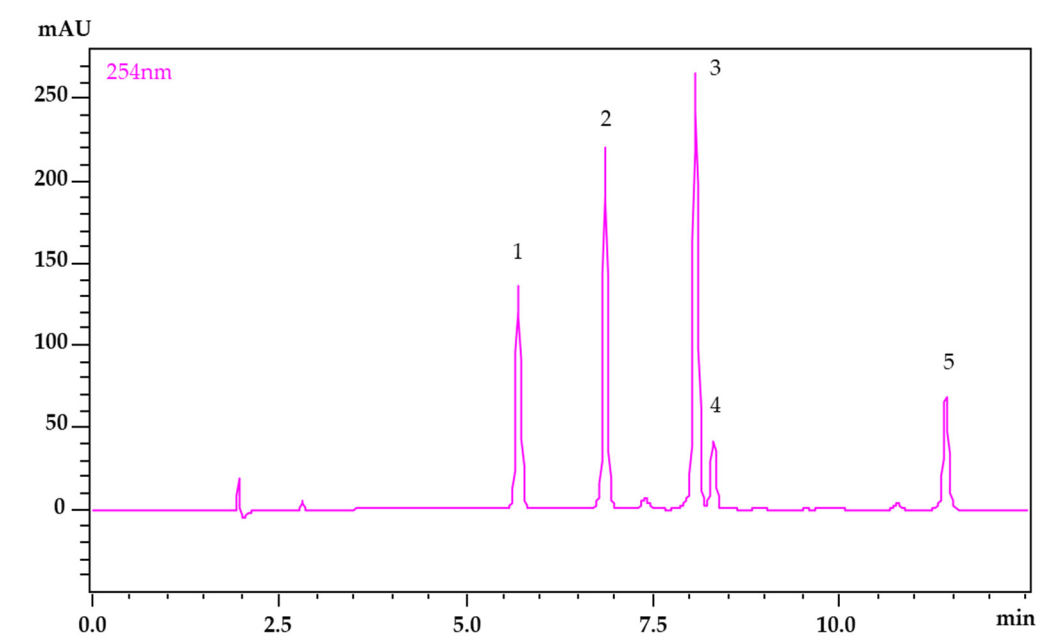

**Figure S2.** Chromatogram of mixed standard solution. (1) chlorogenic acid, (2) rutin, (3) quercitrin, (4) phloridzin, (5) phloretin.

2.1.3. Discovery® HS C18 (150 × 4.6 mm, 5 μm particle size)

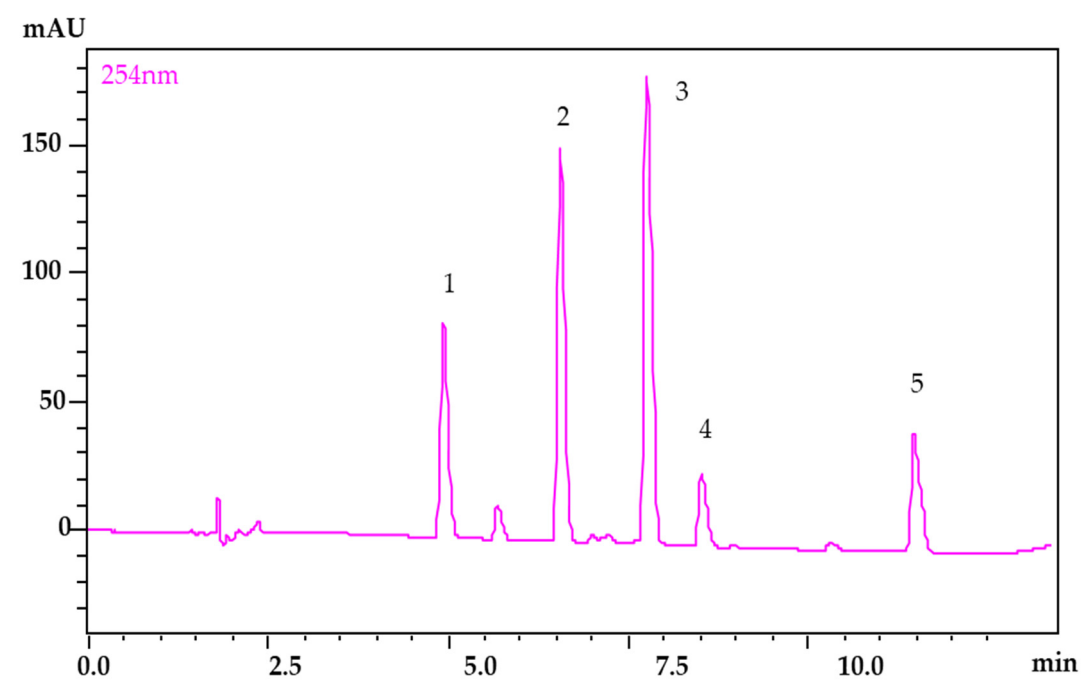

**Figure S3.** Chromatogram of mixed standard solution. (1) chlorogenic acid, (2) rutin, (3) quercitrin, (4) phloridzin, (5) phloretin.

2.1.4. Kinetex® F5 100A (150 × 4.6 mm, 2.6 μm particle size)

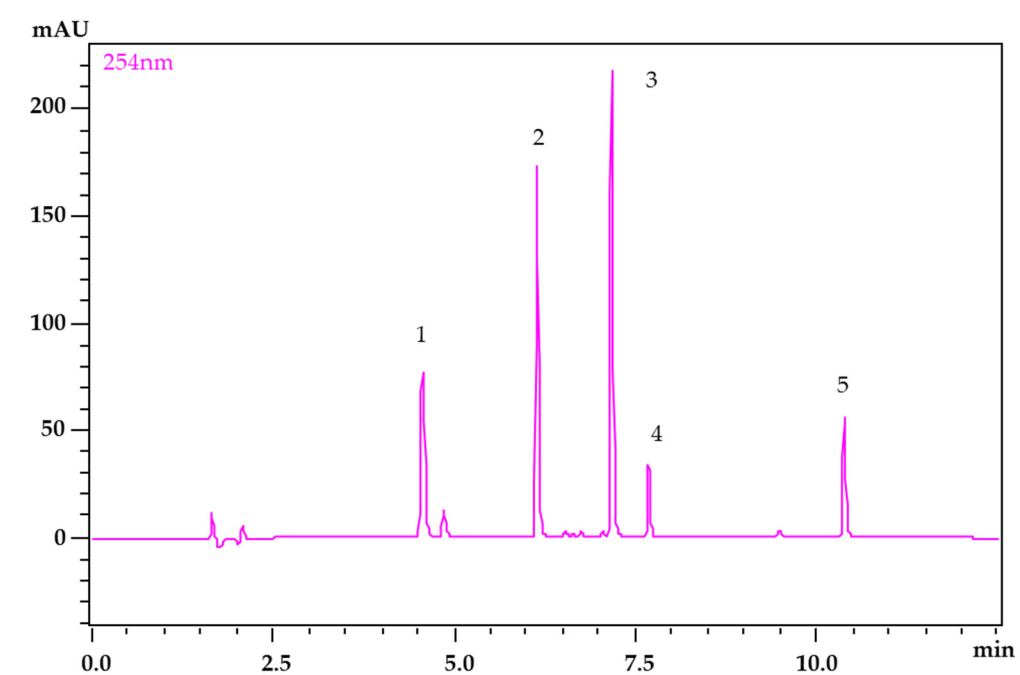

**Figure S4.** Chromatogram of mixed standard solution. (1) chlorogenic acid, (2) rutin, (3) quercitrin, (4) phloridzin, (5) phloretin.

2.1.5. Kinetex® C18 100A (150 × 4.6 mm, 2.6 μm particle size)

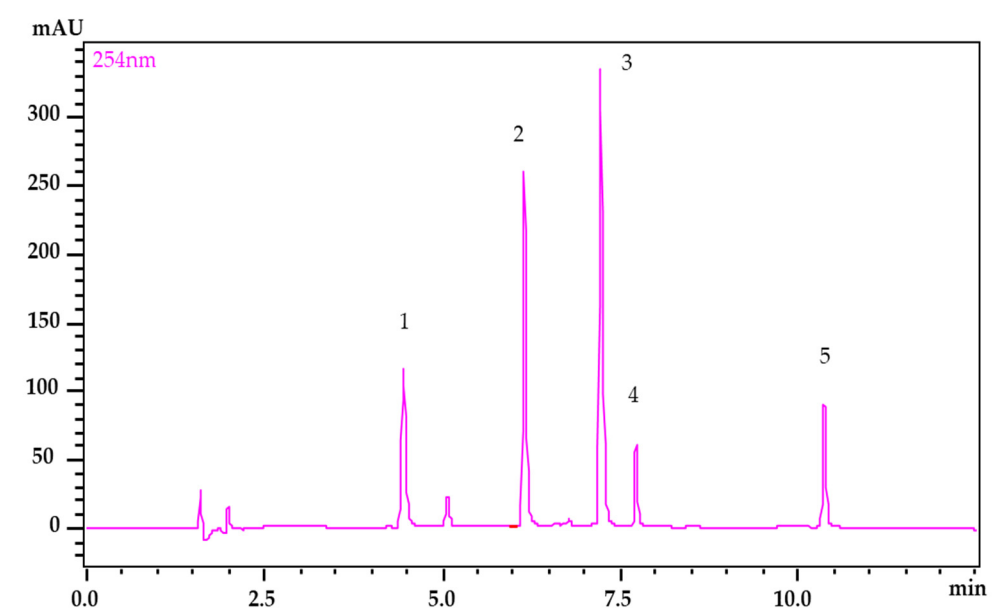

**Figure S5.** Chromatogram of mixed standard solution. (1) chlorogenic acid, (2) rutin, (3) quercitrin, (4) phloridzin, (5) phloretin.

2.1.6. Luna Omega Polar C18 (150 × 4.6 mm, 5 μm particle size)

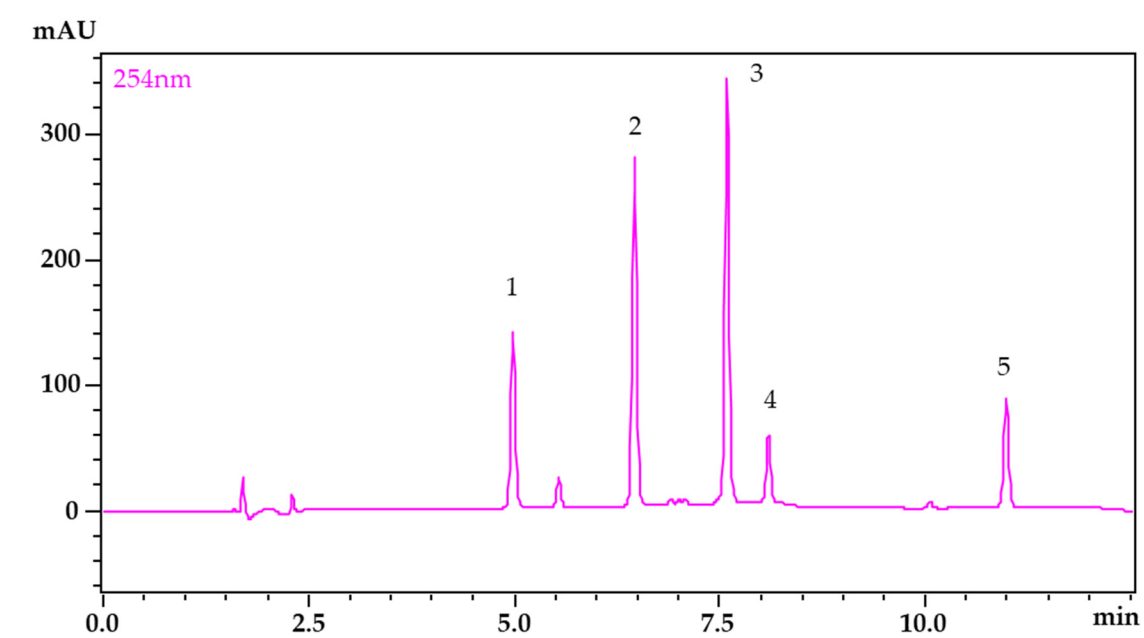

**Figure S6.** Chromatogram of mixed standard solution. (1) chlorogenic acid, (2) rutin, (3) quercitrin, (4) phloridzin, (5) phloretin.

2.1.7. Kinetex 100A Biphenyl (150 × 4.6 mm, 5 μm particle size)

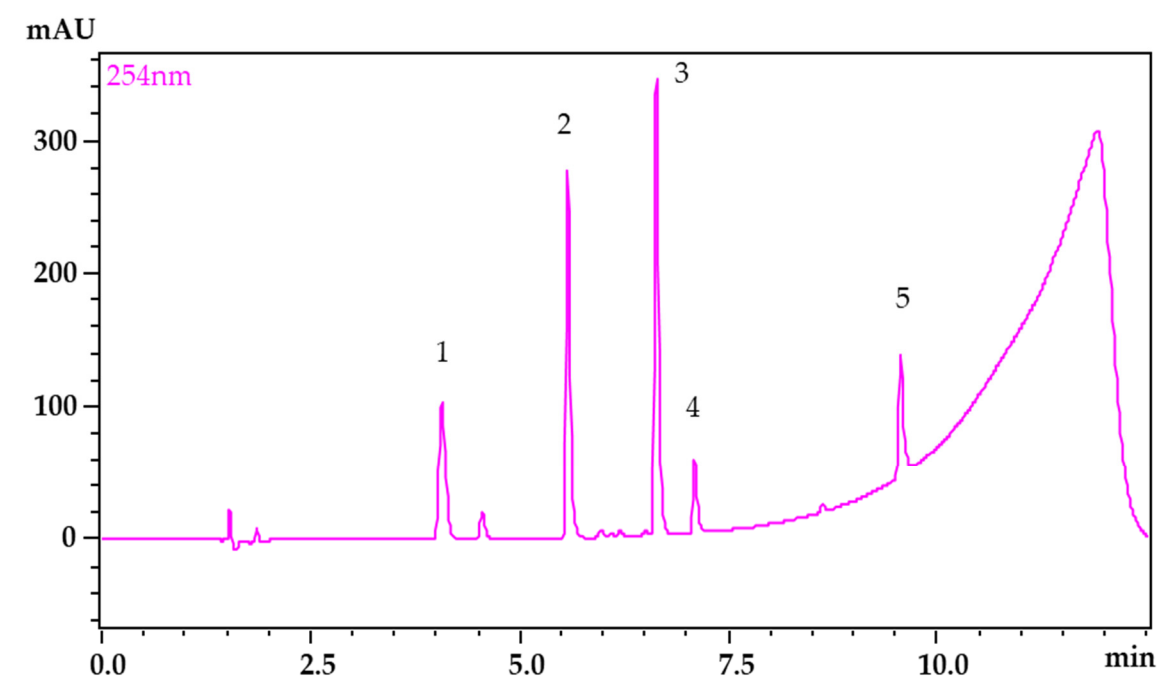

**Figure S7.** Chromatogram of mixed standard solution. (1) chlorogenic acid, (2) rutin, (3) quercitrin, (4) phloridzin, (5) phloretin.

2.1.8. Ascentis Express RP amide (150 × 4.6 mm, 2.7 μm particle size)

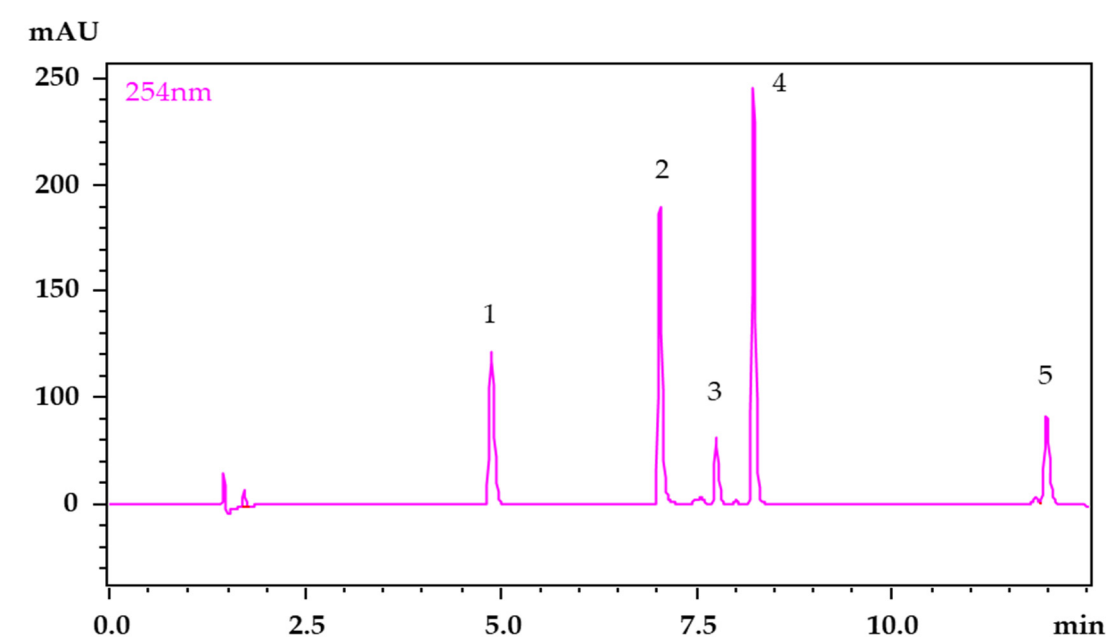

**Figure S8.** Chromatogram of mixed standard solution. (1) chlorogenic acid, (2) rutin, (3) phloridzin, (4) quercitrin, (5) phloretin.

2.2. The parameters of chromatography separation of tested columns

**Table S2:** The parameters of chromatography separation of phenolic compounds on tested columns

| Column                                                | t <sub>R</sub> <sup>a</sup><br>(min) | A <sub>R</sub> <sup>b</sup> | R <sub>S</sub> <sup>c</sup> | W <sub>h(5%)</sub> <sup>d</sup> | W <sub>h(50%)</sub> <sup>e</sup> | P <sub>c</sub> <sup>f</sup> | p <sup>g</sup><br>[MPa] |
|-------------------------------------------------------|--------------------------------------|-----------------------------|-----------------------------|---------------------------------|----------------------------------|-----------------------------|-------------------------|
| <b>YMC Triart C18 100 × 4.6 mm; 5 μm, 12 nm</b>       |                                      |                             |                             |                                 |                                  |                             | 6.5                     |
| Chlorogenic acid                                      | 4.26                                 | 1.22                        | 22.43                       | 0.17                            | 0.08                             | 24                          |                         |
| Rutin                                                 | 5.83                                 | 1.25                        | 11.11                       | 0.15                            | 0.07                             | 34                          |                         |
| Quercitrin                                            | 6.94                                 | 1.23                        | 8.10                        | 0.15                            | 0.07                             | 34                          |                         |
| Phloridzin                                            | 7.34                                 | 1.23                        | 2.90                        | 0.15                            | 0.07                             | 42                          |                         |
| Phloretin                                             | 10.18                                | 1.20                        | 18.99                       | 0.18                            | 0.08                             | 26                          |                         |
| <b>YMC Triart C18 ExRS 150 × 4.6 mm; 5 μm, 8 nm</b>   |                                      |                             |                             |                                 |                                  |                             | 9.5                     |
| Chlorogenic acid                                      | 4.35                                 | 1.15                        | 21.20                       | 0.16                            | 0.07                             | 31                          |                         |
| Rutin                                                 | 5.76                                 | 1.25                        | 10.58                       | 0.14                            | 0.06                             | 38                          |                         |
| Quercitrin                                            | 6.89                                 | 1.23                        | 8.82                        | 0.14                            | 0.07                             | 37                          |                         |
| Phloridzin                                            | 7.45                                 | 1.19                        | 4.34                        | 0.14                            | 0.07                             | 40                          |                         |
| Phloretin                                             | 10.38                                | 1.19                        | 22.23                       | 0.15                            | 0.07                             | 37                          |                         |
| <b>YMC Triart PFP plus 150 × 4.6 mm; 5 um, 12 nm</b>  |                                      |                             |                             |                                 |                                  |                             | 6.7                     |
| Chlorogenic acid                                      | 5.66                                 | 1.12                        | 26.30                       | 0.16                            | 0.07                             | 28                          |                         |
| Rutin                                                 | 6.83                                 | 1.10                        | 8.46                        | 0.16                            | 0.07                             | 29                          |                         |
| Quercitrin                                            | 8.03                                 | 1.09                        | 8.76                        | 0.17                            | 0.07                             | 46                          |                         |
| Phloridzin                                            | 8.26                                 | 1.13                        | 1.68                        | 0.15                            | 0.07                             | 47                          |                         |
| Phloretin                                             | 11.32                                | 1.10                        | 20.82                       | 0.20                            | 0.08                             | 30                          |                         |
| <b>Discovery HS C18 150 × 4.6 mm, 5 μm</b>            |                                      |                             |                             |                                 |                                  |                             | 7.7                     |
| Chlorogenic acid                                      | 4.63                                 | 1.41                        | 16.21                       | 0.22                            | 0.11                             | 27                          |                         |
| Rutin                                                 | 6.14                                 | 1.52                        | 7.61                        | 0.20                            | 0.11                             | 34                          |                         |
| Quercitrin                                            | 7.26                                 | 1.61                        | 5.49                        | 0.22                            | 0.12                             | 33                          |                         |
| Phloridzin                                            | 7.97                                 | 1.65                        | 3.32                        | 0.22                            | 0.18                             | 35                          |                         |
| Phloretin                                             | 10.73                                | 1.76                        | 11.81                       | 0.26                            | 0.14                             | 30                          |                         |
| <b>Kinetex F5 100A 150 × 4.6 mm, 2.6 μm</b>           |                                      |                             |                             |                                 |                                  |                             | 22                      |
| Chlorogenic acid                                      | 4.56                                 | 1.34                        | 32.77                       | 0.13                            | 0.06                             | 43                          |                         |
| Rutin                                                 | 6.14                                 | 1.55                        | 11.67                       | 0.10                            | 0.04                             | 43                          |                         |
| Quercitrin                                            | 7.17                                 | 1.48                        | 8.37                        | 0.10                            | 0.04                             | 37                          |                         |
| Phloridzin                                            | 7.68                                 | 1.45                        | 5.79                        | 0.10                            | 0.04                             | 57                          |                         |
| Phloretin                                             | 10.38                                | 1.35                        | 29.17                       | 0.11                            | 0.05                             | 44                          |                         |
| <b>Kinetex C18 100A 150 × 4.6 mm, 2.6 μm</b>          |                                      |                             |                             |                                 |                                  |                             | 21.5                    |
| Chlorogenic acid                                      | 4.45                                 | 1.47                        | 16.11                       | 0.16                            | 0.07                             | 32                          |                         |
| Rutin                                                 | 4.45                                 | 1.47                        | 16.11                       | 0.13                            | 0.07                             | 32                          |                         |
| Quercitrin                                            | 7.23                                 | 1.64                        | 10.35                       | 0.13                            | 0.05                             | 39                          |                         |
| Phloridzin                                            | 7.73                                 | 1.42                        | 5.01                        | 0.11                            | 0.05                             | 53                          |                         |
| Phloretin                                             | 10.37                                | 1.42                        | 26.32                       | 0.13                            | 0.05                             | 53                          |                         |
| <b>Luna Omega Polar C18 150 × 4.6 mm, 5 μm</b>        |                                      |                             |                             |                                 |                                  |                             | 6.7                     |
| Chlorogenic acid                                      | 4.98                                 | 1.17                        | 27.95                       | 0.14                            | 0.06                             | 37                          |                         |
| Rutin                                                 | 6.46                                 | 1.19                        | 12.78                       | 0.13                            | 0.05                             | 37                          |                         |
| Quercitrin                                            | 7.59                                 | 1.15                        | 10.09                       | 0.13                            | 0.06                             | 32                          |                         |
| Phloridzin                                            | 8.09                                 | 1.15                        | 4.34                        | 0.14                            | 0.06                             | 57                          |                         |
| Phloretin                                             | 10.98                                | 1.08                        | 23.37                       | 0.15                            | 0.07                             | 34                          |                         |
| <b>Kinetex 100A Biphenyl 150 × 4.6 mm, 5 μm</b>       |                                      |                             |                             |                                 |                                  |                             | 9                       |
| Chlorogenic acid                                      | 4.07                                 | 1.24                        | 19.6                        | 0.18                            | 0.09                             | 43                          |                         |
| Rutin                                                 | 5.57                                 | 1.53                        | 11.36                       | 0.13                            | 0.05                             | 56                          |                         |
| Quercitrin                                            | 6.63                                 | 1.55                        | 9.68                        | 0.13                            | 0.05                             | 44                          |                         |
| Phloridzin                                            | 7.10                                 | 1.54                        | 4.27                        | 0.13                            | 0.05                             | 58                          |                         |
| Phloretin                                             | 9.56                                 | 1.47                        | 21.62                       | 0.14                            | 0.06                             | 51                          |                         |
| <b>Ascentis Express RP Amide 150 × 4.6 mm, 2.7 μm</b> |                                      |                             |                             |                                 |                                  |                             | 19.6                    |
| Chlorogenic acid                                      | 4.88                                 | 1.37                        | 29.28                       | 0.16                            | 0.07                             | 43                          |                         |
| Rutin                                                 | 7.03                                 | 1.59                        | 16.98                       | 0.13                            | 0.05                             | 36                          |                         |
| Phloridzin                                            | 7.76                                 | 1.39                        | 6.99                        | 0.11                            | 0.05                             | 58                          |                         |
| Quercitrin                                            | 8.23                                 | 1.40                        | 4.65                        | 0.12                            | 0.05                             | 51                          |                         |
| Phloretin                                             | 11.98                                | 1.28                        | 30.47                       | 0.16                            | 0.07                             | 55                          |                         |

<sup>a</sup> Retention time  
<sup>b</sup> Peak symmetry  
<sup>c</sup> Peak resolution  
<sup>d</sup> Peak width at 5% of the peak height  
<sup>e</sup> Peak width at 50% of the peak height  
<sup>f</sup> Peak capacity (counting with time of gradient elution, 12.51 minutes)  
<sup>g</sup> Pressure

### 2.3. Optimization of extraction procedure – the effect of pH

**Table S3:** Content of phenolic compounds in leaves of 9 cultivars (all values in mg/g of dried weight (DW)).

| Cultivar          | Type of extraction solvent (mg/g $\pm$ SD) |                                            |
|-------------------|--------------------------------------------|--------------------------------------------|
|                   | Methanol + 0.1% formic acid<br>(pH = 2.75) | Methanol + 0.1% acetic acid<br>(pH = 3.25) |
| 'Melrose'         | 50.06 $\pm$ 2.21                           | 48.04 $\pm$ 1.19                           |
| 'Melodie'         | 72.25 $\pm$ 4.73                           | 64.14 $\pm$ 4.52                           |
| 'Rubinola'        | 48.15 $\pm$ 3.83                           | 47.31 $\pm$ 2.60                           |
| 'Průsvitné letní' | 58.38 $\pm$ 1.97                           | 56.04 $\pm$ 2.85                           |
| 'Fragrance'       | 54.88 $\pm$ 4.18                           | 46.42 $\pm$ 18.88                          |
| 'Goldstar'        | 49.11 $\pm$ 1.69                           | 44.05 $\pm$ 2.53                           |
| 'Topaz'           | 61.18 $\pm$ 2.08                           | 47.35 $\pm$ 7.92                           |
| 'Bohemia Gold'    | 61.44 $\pm$ 1.86                           | 64.20 $\pm$ 4.81                           |
| 'Gloster'         | 53.48 $\pm$ 2.11                           | 53.62 $\pm$ 0.93                           |

Concentrations  $\pm$  standard deviation (RSD, %) calculated from the mean of 3 measurements.

## 3. Flow analysis with CoulArray Detector

### 3.1. FIAGram

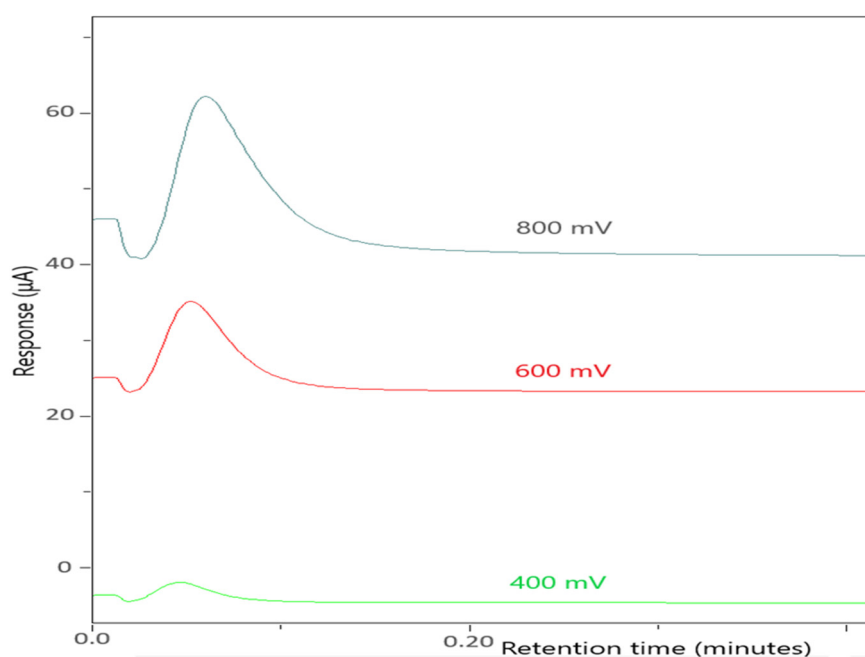

**Figure S9.** FIAGram of apple bark extract.



### 3.2. The total antioxidant activity of tested cultivars

**Table S4:** The total antioxidant activity of tested cultivars in  $\mu\text{C}$

| Cultivar          | Leaves<br>( $\mu\text{C}\pm\text{SD}$ ) | Bark<br>( $\mu\text{C}\pm\text{SD}$ ) | Buds<br>( $\mu\text{C}\pm\text{SD}$ ) |
|-------------------|-----------------------------------------|---------------------------------------|---------------------------------------|
| 'Melrose'         | 108.25 $\pm$ 2.32                       | -                                     | 59.90 $\pm$ 7.19                      |
| 'Melodie'         | 92.88 $\pm$ 2.28                        | 69.84 $\pm$ 0.62                      | 102.91 $\pm$ 6.75                     |
| 'James Grieve'    | 95.29 $\pm$ 2.65                        | 88.72 $\pm$ 2.47                      | 85.63 $\pm$ 2.16                      |
| 'Rubinola'        | 96.22 $\pm$ 2.08                        | 74.02 $\pm$ 2.40                      | 75.46 $\pm$ 4.25                      |
| 'Goldstar'        | 71.88 $\pm$ 1.65                        | 64.95 $\pm$ 2.34                      | -                                     |
| 'Meteor'          | 78.03 $\pm$ 5.26                        | 59.17 $\pm$ 2.56                      | -                                     |
| 'Průsvitné letní' | 74.88 $\pm$ 1.29                        | 68.80 $\pm$ 1.35                      | 83.14 $\pm$ 1.47                      |
| 'Topaz'           | 119.63 $\pm$ 2.76                       | 92.78 $\pm$ 1.73                      | 94.14 $\pm$ 0.30                      |
| 'Red Bilt'        | 80.01 $\pm$ 3.94                        | 79.77 $\pm$ 4.80                      | 83.88 $\pm$ 10.42                     |
| 'Spartan'         | 97.76 $\pm$ 1.48                        | 96.15 $\pm$ 1.46                      | -                                     |
| 'Fragrance'       | 71.52 $\pm$ 3.19                        | 87.15 $\pm$ 0.47                      | 68.52 $\pm$ 8.60                      |
| 'Gloster'         | 110.10 $\pm$ 1.06                       | 79.63 $\pm$ 4.80                      | 80.90 $\pm$ 6.30                      |
| 'Bohemia Gold'    | 90.99 $\pm$ 2.28                        | 71.64 $\pm$ 1.77                      | 80.88 $\pm$ 8.70                      |

Concentrations  $\pm$  standard deviation (RSD, %) calculated from the mean of 3 measurements.

## 4. Graphical evaluation of the concentration of individual phenolic compounds

### 4.1. The concentration of individual phenolic compounds expressed in mg/g DW obtained from apple leaves

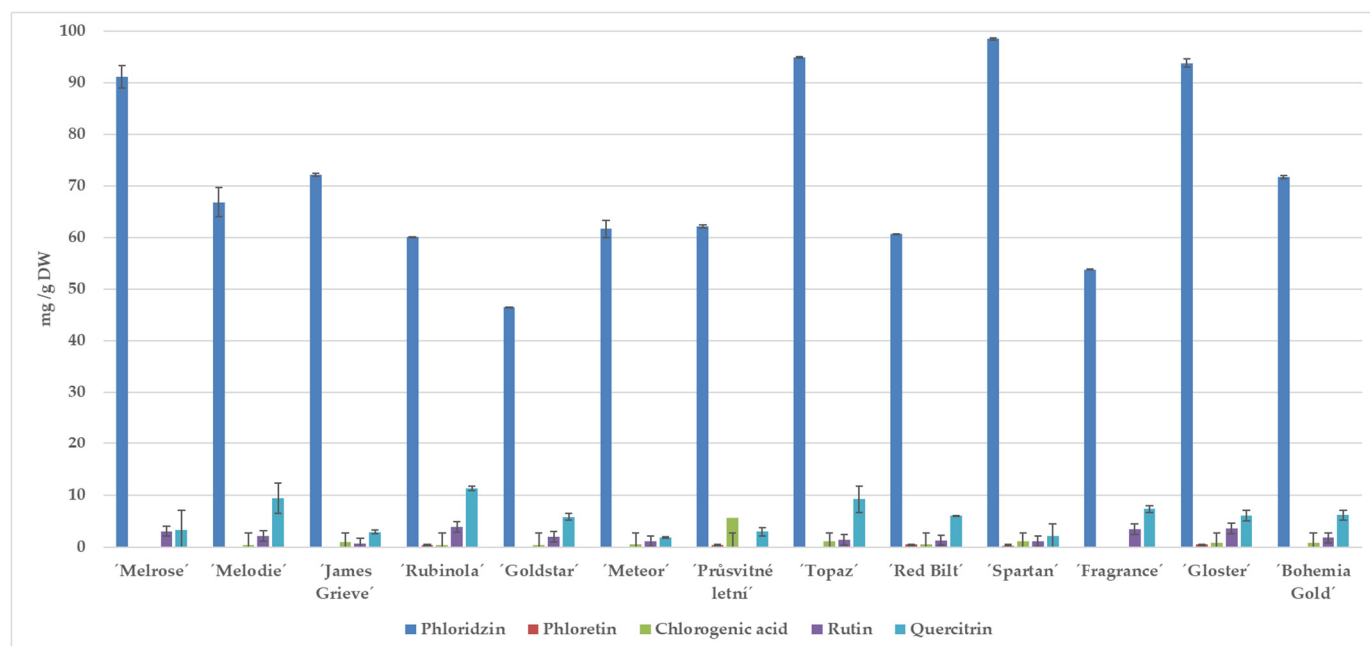

**Figure S10.** The concentration of individual phenolic compounds expressed in mg/g DW obtained from apple leaves. Concentrations  $\pm$  standard deviation (RSD, %) calculated from the mean of 3 measurements.

#### 4.2. The concentration of individual phenolic compounds expressed in mg/g DW obtained from apple bark

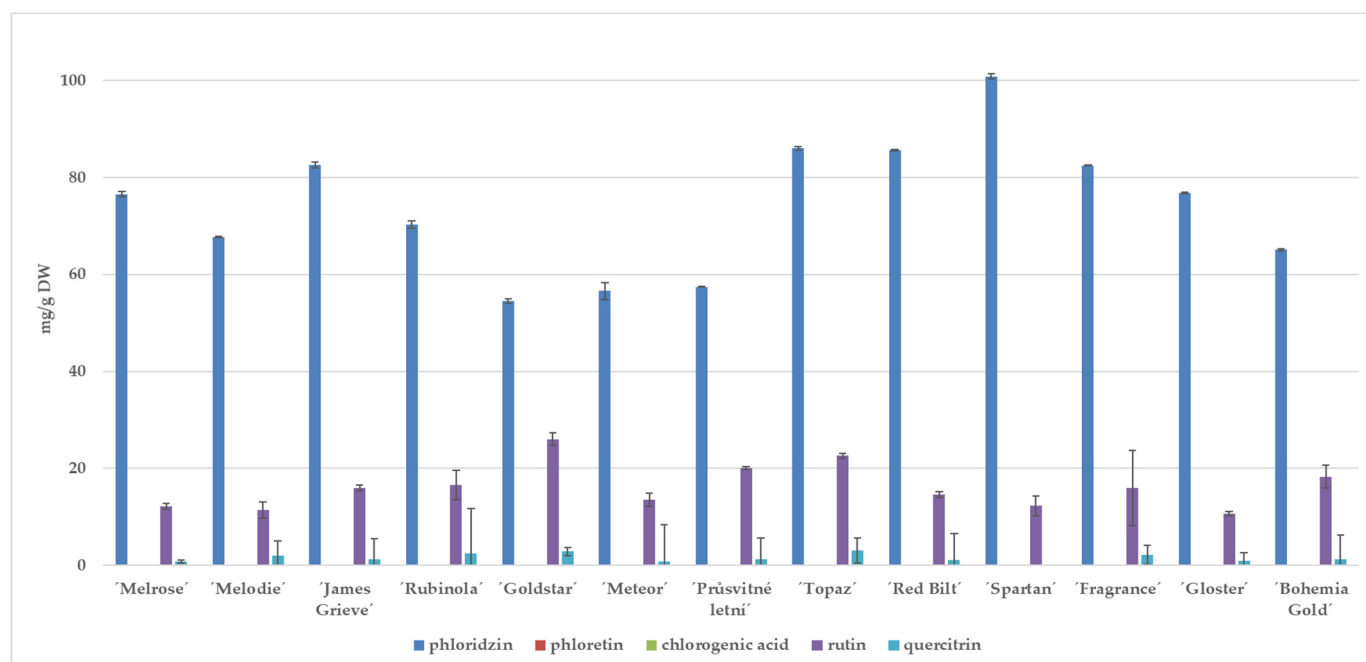

**Figure S11.** The concentration of individual phenolic compounds expressed in mg/g DW obtained from apple bark. Concentrations  $\pm$  standard deviation (RSD, %) calculated from the mean of 3 measurements.

#### 4.3. The concentration of individual phenolic compounds expressed in mg/g DW obtained from apple buds

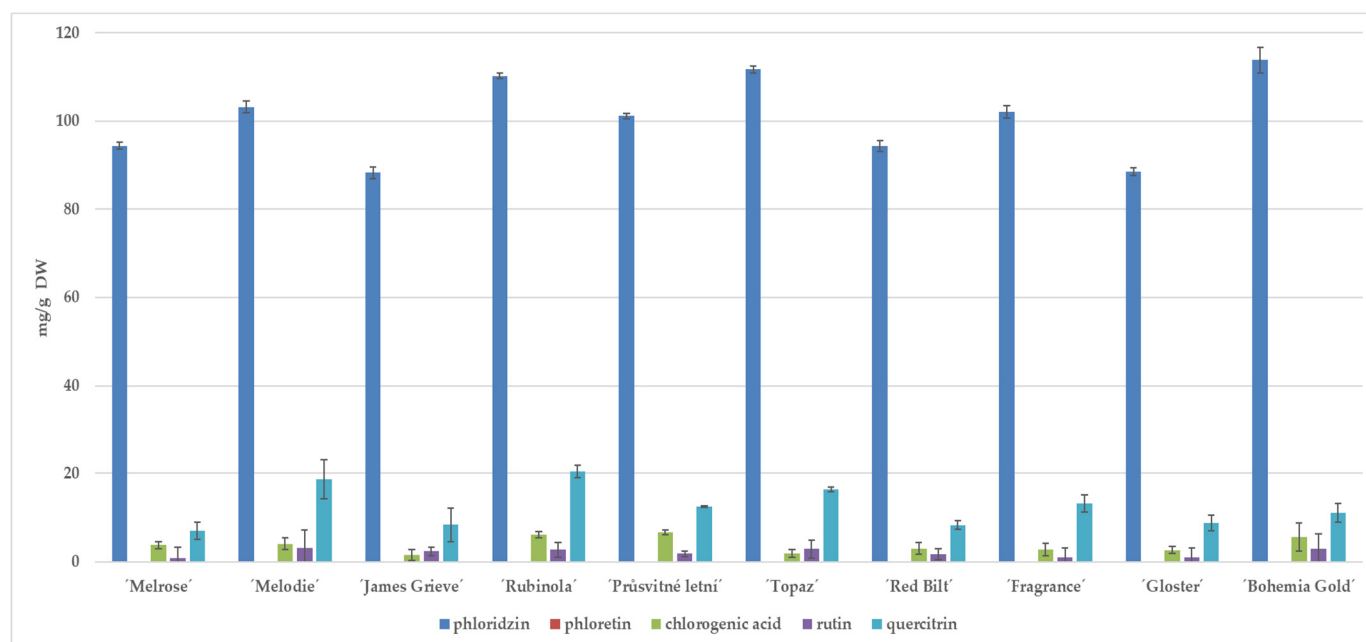

**Figure S12.** The concentration of individual phenolic compounds expressed in mg/g DW obtained from apple buds. Concentrations  $\pm$  standard deviation (RSD, %) calculated from the mean of 3 measurements.

## References

1. Liaudanskas, M., Viškelis, P., Raudonis, R., Kviklys, D., Uselis, N., Janulis, V. Phenolic composition and antioxidant activity of *Malus domestica* leaves. *Sci World J* **2014**, 306217 <https://doi.org/10.1155/2014/306217>
2. Sowa, A.; Zgórk, G.; Szykuła, A.; Franiczek, R.; Żbikowska, B.; Gamian, A.; Sroka, Z. Analysis of Polyphenolic Compounds in Extracts from Leaves of Some *Malus domestica* Cultivars: Antiradical and Antimicrobial Analysis of These Extracts. *BioMed Res Int* **2016**, 2016, 1-12 <https://doi.org/10.1155/2016/6705431>
3. Rana, S.; Kumar, S.; Rana, A.; Sharma, V.; Katoch, P.; Padwad, Y.; Bhushan, S. Phenolic constituents from apple tree leaves and their in vitro biological activity. *Ind Crop Prod* **2016**, 90, 118-125. <https://doi.org/10.1016/j.indcrop.2016.06.027>
